# Supplementary material for: Tetrathia[22]annulene[2,1,2,1]: physical properties, crystal structure and application in organic field-effect transistors
Source: Royal Society of Chemistry journal article supplement (doi:10.1039/b709324a), 2007-01-01
Supplement: b709324a.pdf [file b709324a.pdf]

## Electronic Supplementary Information

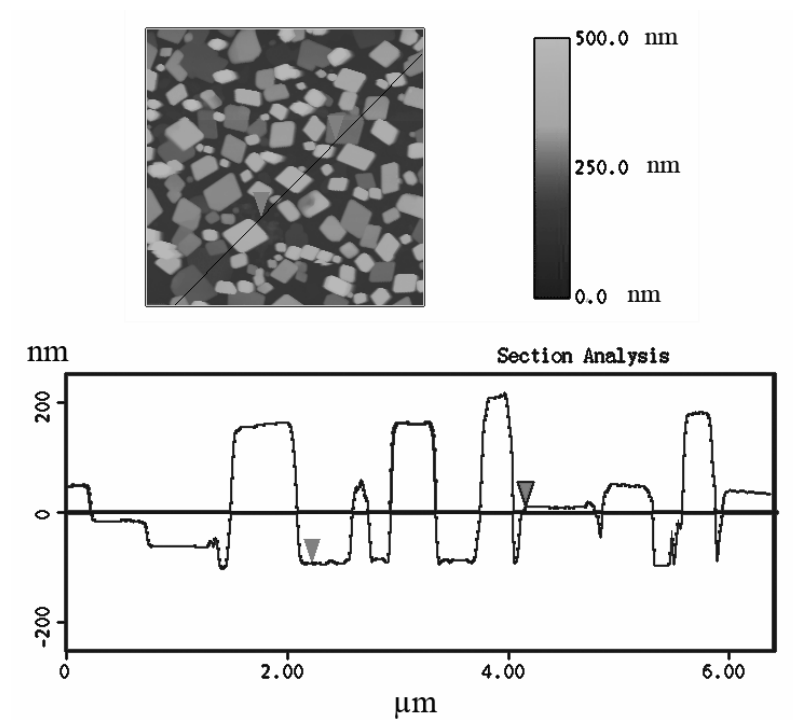

**Fig. S1** AFM images (5 × 5 μm) of 50 nm thick film of **1** deposited on SiO<sub>2</sub>/Si substrate,  $T_{\text{sub}} = 100\text{ }^{\circ}\text{C}$ .

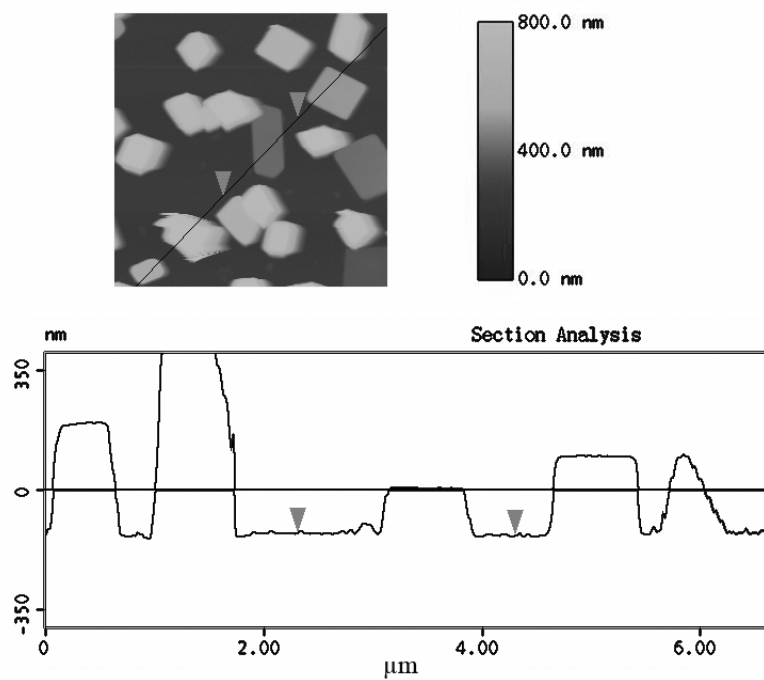

**Fig. S2** AFM images (5 × 5 μm) of 50 nm thick film of **1** deposited on OTS/SiO<sub>2</sub>/Si substrate,  $T_{\text{sub}} = 100\text{ }^{\circ}\text{C}$ .
